# Supplementary material
Source: PubMed Central journal article supplement (PMC3735771)
Supplement: supp_121286_vari-leeflang-1-at.pdf [file supp_121286_vari-leeflang-1-at.pdf]

**Appendix 1 (as supplied by authors): Details of the included reviews.**

| Author                                 | Topic                                                                             | Index test                         | Reference standard(s)                                                                               | N <sup>1</sup> | Median prevalence (range) | Setting <sup>2,4</sup>                                                  | Consecutive or random enrollment? <sup>2</sup> | Exclusion of patients with difficult-to-diagnose conditions? | Patient referral based on <sup>2,5</sup>          | Partial Verification? <sup>2,6</sup> | Differential Verification? <sup>2,7</sup> |
|----------------------------------------|-----------------------------------------------------------------------------------|------------------------------------|-----------------------------------------------------------------------------------------------------|----------------|---------------------------|-------------------------------------------------------------------------|------------------------------------------------|--------------------------------------------------------------|---------------------------------------------------|--------------------------------------|-------------------------------------------|
| Berger <sup>17</sup>                   | Diagnosis of gallstones                                                           | Upper abdominal pain               | Ultrasound or oral cholecystography                                                                 | 11 (83-1896)   | 0.13 (0.05-0.41)          | 6x primary care, 1x tertiary care, 2x secondary care, 2x NR             | 2x yes, 6x no, 3x NR                           | 10x no, 1x yes                                               | 8x symptoms, 3x reference or other test           | 11x no                               | 3x yes, 8x no                             |
| Deville <sup>18</sup>                  | Workup of herniated discs in patients selected for surgery                        | Straight leg raising test          | Surgery                                                                                             | 11 (52-2504)   | 0.77 (0.56-0.98)          | 11x NR                                                                  | 2x yes, 6x no, 3x NR                           | 9x no, 2x yes                                                | 1x symptoms, 10x other test                       | 11x no                               | 11x no                                    |
| Fiellin <sup>19</sup>                  | Screening for lifetime alcohol abuse and/or dependence in primary care settings   | Questionnaire                      | DSM-III-R or DSM-IV <sup>1</sup> , derived from a variety of questionnaires                         | 12 (84-1333)   | 0.28 (0.05-0.45)          | 12x primary care                                                        | 6x yes, 5x no, 1x NR                           | 10x no, 2x yes                                               | 10x symptoms, 2x other test                       | 3x yes, 9x no                        | 12x no                                    |
| Gould <sup>20</sup>                    | Workup of pulmonary nodules                                                       | Positron emission tomography       | Most studies used histopathology; others surgery, imaging techniques or biopsy                      | 29 (17-109)    | 0.70 (0.50-0.96)          | 1x primary care, 1x combination, 5x secondary care, 22x NR              | 2x yes, 23x no, 4x NR                          | 26x no, 3x yes                                               | 5x index test, 23x other test, 1x NR              | 2x yes, 27x no                       | 20x yes, 9x no                            |
| Hobby <sup>21</sup>                    | Diagnosis of complete tears of the triangular fibrocartilage complex in the wrist | magnetic resonance imaging         | Arthroscopy; two studies used surgery                                                               | 11 (13-102)    | 0.50 (0.39-0.94)          | 10x secondary and tertiary care, 1x NR                                  | 5x yes, 3x no, 3x NR                           | 10x no                                                       | 6x symptoms, 1x index test, 2x other test, 2x NR  | 4x yes, 6x no                        | 1x yes, 9x no                             |
| Hoffman <sup>22</sup>                  | Workup of prostate cancer                                                         | Prostate specific antigen          | Radical prostatectomy or prostate biopsies                                                          | 10 (29-673)    | 0.41 (0.22-0.76)          | 9x secondary care, 1x primary care                                      | 3x yes, 3x no, 4x NR                           | 6x no, 4x yes                                                | 5x symptoms, 1x index test, 4x other test         | 10x no                               | 3x yes, 7x no                             |
| Hoogendam <sup>23</sup>                | Primary care screening for prostate cancer                                        | Digital Rectal Examination         | Biopsy or transrectal ultrasonography                                                               | 13 (309-6630)  | 0.03 (0.01-0.07)          | 11x primary care, 1x combination, 1x NR                                 | 3x yes, 7x no, 3x NR                           | 3x yes                                                       | 12x symptoms                                      | 5x yes, 7x no, 1x NR                 | 12x yes                                   |
| Huicho <sup>24</sup>                   | Urinary infections                                                                | Dipstick nitrate                   | Culture                                                                                             | 16 (23-3251)   | 0.15 (0.01-0.30)          | 9x secondary care, 4x NR, 3x only primary care                          | 4x yes, 3x no, 9x NR                           | 15x no, 1x yes                                               | 4x symptoms, 7x other tests, 5x NR                | 16x no                               | 16x no                                    |
| Hurley <sup>25</sup>                   | Diagnosis of Gram-negative infection                                              | Limulus amoebocyte lysate assay    | Blood culture                                                                                       | 22 (10-218)    | 0.25 (0.10-0.68)          | 1x primary care, 8x secondary and tertiary care, 13x NR                 | 1x yes, 5x no, 16x NR                          | 20x no, 2x yes                                               | 10x symptoms, 11x other test, 1x NR               | 21x no, 1x NR                        | 4x yes, 17x no, 1x NR                     |
| Kelly <sup>26</sup>                    | Workup of staging in gastro-esophageal carcinoma                                  | Eosophageal ultrasound             | Surgery and histopathology                                                                          | 13 (13-328)    | 0.60 (0.23-0.85)          | 13x secondary care                                                      | 2x yes, 6x no, 5x NR                           | 11x no, 2x yes                                               | 1x symptoms, 2x index test, 9x other test, 1x NR  | 5x yes, 8x no                        | 13x no                                    |
| Kim <sup>27</sup>                      | Diagnosis of coronary artery disease                                              | Dobutamine stress echocardiography | Coronary angiography                                                                                | 39 (27-288)    | 0.72 (0.29-0.87)          | 1x combination, 4x secondary and tertiary care, 34x NR                  | 21x yes, 14x no, 4x NR                         | 8x no, 31x yes                                               | 7x symptoms, 1x index test, 30x other test, 1x NR | 1x yes, 37x no, 1x NR                | 39x no                                    |
| Kwok <sup>28</sup>                     | Detection of coronary artery disease in women                                     | Exercise echocardiogram            | Coronary angiography                                                                                | 19 (33-613)    | 0.37 (0.18-0.62)          | 19x NR                                                                  | 6x yes, 8x no, 5x NR                           | 15x no, 4x yes                                               | 1x symptoms, 4x index test, 14x other test        | 3x yes, 16x no                       | 19x no                                    |
| Lau <sup>16</sup> + Balk <sup>15</sup> | Emergency department diagnosis of acute myocardial infarction                     | Creatine kinase                    | A variety of reference standards; most studies used WHO criteria                                    | 19 (59-2093)   | 0.22 (0.06-0.42)          | 5x secondary care, 2x tertiary care, 12x NR                             | 3x yes, 12x no, 4x NR                          | 15x no, 4x yes                                               | 10x symptoms, 1x indextest, 8x other* test        | 1x yes, 18x no                       | 1x yes, 18x no                            |
| Lederle <sup>29</sup>                  | Screening for abdominal aortic aneurysm                                           | Abdominal palpation                | Ultrasound                                                                                          | 10 (23-424)    | 0.08 (0.02-0.17)          | 1x secondary and tertiary care, 2x combination, 7x NR                   | 4x yes, 4x no, 2x NR                           | 9x no, 1x yes                                                | 8x symptoms, 2x other test                        | 1x yes, 9x no                        | 2x yes, 8x no                             |
| Mitchell <sup>30</sup>                 | Screening for squamous intraepithelial lesions of the cervix                      | Pap smear                          | Biopsy, or colposcopy guided biopsy                                                                 | 17 (18-3534)   | 0.43 (0.17-0.95)          | 2x primary care, 2x combination, 12x secondary and tertiary care, 1x NR | 1x yes, 6x no, 10x NR                          | 13x no, 4x yes                                               | 6x index test, 10x other test, 1x NR              | 1x yes, 16x no                       | 17x no                                    |
| Moi <sup>31</sup>                      | Detection of Down Syndrome                                                        | Ultrasound                         | Karyotyping and follow-up                                                                           | 22 (99-20381)  | 0.01 (0.00-0.05)          | 5x primary care, 17x secondary care                                     | 9x yes, 1x no, 12x NR                          | 22x no                                                       | 11x symptoms, 9x other test, 2x NR                | 22x no                               | 12x yes, 10x no                           |
| Nelemans <sup>32</sup>                 | Evaluation of peripheral arterial disease                                         | Magnetic resonance angiography     | Angiography                                                                                         | 13 (12-45)     | 0.41 (0.15-0.73)          | 1x secondary care, 12x NR                                               | 2x yes, 11x no                                 | 11x no, 2x yes                                               | 13x reference or other tests                      | 13x no                               | 2x yes, 11x no                            |
| Safriel <sup>33</sup>                  | Diagnosis of pulmonary emboli                                                     | Spiral computed tomography         | A variety of reference standards; mainly pulmonary angiogram and ventilation-perfusion scintigraphy | 10 (20-149)    | 0.46 (0.27-0.82)          | 4x secondary care, 6x NR                                                | 5x yes, 3x not consecutive, 2x NR              | 9x no, 1x yes                                                | 2x symptoms, 8x other test                        | 1x yes, 9x no                        | 4x yes, 6x no                             |

|                       |                                                  |                            |                                                                                 |               |                  |                                                                        |                        |                |                                                  |                |                |
|-----------------------|--------------------------------------------------|----------------------------|---------------------------------------------------------------------------------|---------------|------------------|------------------------------------------------------------------------|------------------------|----------------|--------------------------------------------------|----------------|----------------|
| Sloan <sup>34</sup>   | Diagnosis of gonorrhoea and chlamydial infection | Lower abdominal pain       | A variety of reference standards: culture, bacteriological tests, serology etc. | 14 (172-1222) | 0.13 (0.03-0.37) | 4x primary care, 5x combination, 1x secondary and tertiary care, 4x NR | 6x yes, 2x no, 6x NR   | 13x no, 1x yes | 14x symptoms                                     | 13x no, 1x NR  | 12x no, 2x NR  |
| Sonnad <sup>35</sup>  | Workup of staging of prostate cancer.            | Magnetic resonance imaging | Prostatectomy, combined with pathology                                          | 21 (18-235)   | 0.48 (0.23-0.82) | 22x secondary and tertiary care                                        | 7x yes, 5x no, 10x NR  | 22x no         | 22x reference test or other test                 | 3x yes, 19 no  | 1x yes, 21x no |
| Vasquez <sup>36</sup> | Workup of acute cholecystitis                    | Cholescintigraphy          | Surgery and histopathology; follow up                                           | 15 (20-163)   | 0.47 (0.10-0.72) | 15x secondary care                                                     | 2x yes, 1x no, 12x NR  | 12x no, 3x yes | 1x symptoms, 13x index test, 1x other test       | 14x no, 1x NR  | 15x yes        |
| Visser <sup>37</sup>  | Workup of peripheral arterial stenosis           | Colour duplex ultrasound   | Angiography                                                                     | 17 (12-167)   | 0.29 (0.05-0.72) | 15x NR, 2x secondary and tertiary care                                 | 4x yes, 5x no, 8x NR   | 17x no         | 6x symptoms, 1x index test, 8x other test, 2x NR | 17x no         | 17x no         |
| Wiese <sup>38</sup>   | Diagnosis of vaginal trichomoniasis              | Wet mount slide            | Culture                                                                         | 29 (68-1199)  | 0.26 (0.07-0.55) | 28x tertiary care, 1x NR                                               | 13x yes, 4x no, 12x NR | 27x no, 2x yes | 27x symptoms, 2x NR                              | 1x yes, 28x no | 1x yes, 28x no |

<sup>1</sup>Number of studies, between brackets the range of included patients per study.

<sup>2</sup>NR = not reported.

<sup>3</sup>DSM = Diagnostic and Statistical Manual of Mental Disorders.

<sup>4</sup>Setting could be either primary care, secondary care and/or tertiary care or a combination of primary and secondary/tertiary care

<sup>5</sup>Patients could be referred to be included in the study based on symptoms, on the index test result, on the reference standard result, or based on the results of another test.

<sup>6</sup>Partial verification occurs when only a part of the included patients receives the reference standard, for example, if only some of the index test negatives receive the reference standard.

<sup>7</sup>Differential verification occurs when two reference standards have been used, often one for the index test positives and a different one for the index test negatives.
