# Supplementary material
Source: PubMed Central journal article supplement (PMC3735771)
Supplement: supp_121286_vari-leeflang-2-at.pdf [file supp_121286_vari-leeflang-2-at.pdf]

**Appendix 2 (as supplied by authors): Association between prevalence and other study characteristics and logit sensitivity and logit specificity.**

| Study                   | Covariate used in model                                     | AIC <sup>1</sup> | <i>p</i> value <sup>2</sup><br>(logit sensitivity) | <i>P</i> value <sup>2</sup><br>(logit specificity) |
|-------------------------|-------------------------------------------------------------|------------------|----------------------------------------------------|----------------------------------------------------|
| Fiellin <sup>19</sup>   | Prevalence                                                  | 182.5            | 0.4                                                | 0.01                                               |
|                         | Partial verification <sup>3</sup>                           | 185.3            | 0.3                                                | 0.2                                                |
| Gould <sup>20</sup>     | Prevalence                                                  | 200.5            | 0.8                                                | 0.01                                               |
|                         | Exclusion of patients with difficult-to-diagnose conditions | 206.3            | 0.4                                                | 0.6                                                |
|                         | Patient referral pattern                                    | 201.9            | 1.0                                                | 0.004                                              |
|                         | Differential verification <sup>4</sup>                      | 207.1            | 0.6                                                | 0.7                                                |
| Hoogendam <sup>23</sup> | Prevalence                                                  | 222.0            | 0.6                                                | 0.02                                               |
|                         | Partial verification <sup>3</sup>                           | 226.5            | 0.3                                                | 1.0                                                |
|                         | Consecutive enrolment                                       | 226.8            | 0.5                                                | 0.7                                                |
|                         | Exclusion of patients with difficult-to-diagnose conditions | 222.6            | 0.5                                                | 0.04                                               |
| Kim <sup>27</sup>       | Prevalence                                                  | 417.9            | 0.0005                                             | 0.02                                               |
|                         | Consecutive enrollment                                      | 433.4            | 0.5                                                | 0.8                                                |
|                         | Exclusion of patients with difficult-to-diagnose conditions | 427.7            | 0.04                                               | 0.1                                                |
|                         | Patient referral pattern                                    | 430              | 0.2                                                | 0.1                                                |
| Mitchell <sup>30</sup>  | Prevalence                                                  | 275.9            | 0.6                                                | 0.03                                               |
|                         | Setting                                                     | 280.3            | 0.7                                                | 0.7                                                |
|                         | Exclusion of patients with difficult-to-diagnose conditions | 277.3            | 0.3                                                | 0.8                                                |
|                         | Patient referral pattern                                    | 278.9            | 0.2                                                | 0.3                                                |
| Mol <sup>31</sup>       | Prevalence                                                  | 325.1            | 0.6                                                | 0.02                                               |
|                         | Setting                                                     | 324.9            | 0.6                                                | 0.01                                               |
|                         | Patient referral pattern                                    | 327.6            | 0.5                                                | 0.1                                                |
|                         | Differential verification <sup>4</sup>                      | 325.6            | 0.3                                                | 0.04                                               |
| Visser <sup>37</sup>    | Prevalence                                                  | 251.2            | 0.1                                                | 0.003                                              |
|                         | Patient referral pattern                                    | 254.9            | 0.5                                                | 0.03                                               |

<sup>1</sup>AIC: Akaike's Information Criterion (lower AIC corresponds to better fit).

<sup>2</sup>A *p* value below 0.05 indicates that there is a significant association between the listed covariate and logit sensitivity (second last column) or logit specificity (last column).

<sup>3</sup>Partial verification refers to the situation where only a subset of the patients included in the study undergo the reference standard.

<sup>4</sup>Differential verification refers to the use of two or more reference standards.
